# Supplementary material for: Tau induces PSD95–neuronal NOS uncoupling and neurovascular dysfunction independent of neurodegeneration
Source: Springer Nature journal article supplement (doi:10.1038/s41593-020-0686-7), 2020-08-10
Supplement: 41593_2020_686_MOESM1_ESM.pdf [file 41593_2020_686_MOESM1_ESM.pdf]

---

**Supplementary information**

---

**Tau induces PSD95–neuronal NOS uncoupling and neurovascular dysfunction independent of neurodegeneration**

---

In the format provided by the authors and unedited

## Supplementary Information

### **Tau induces PSD95-nNOS uncoupling and neurovascular dysfunction independent of neurodegeneration**

Laibaik Park<sup>1</sup>

Karin Hochrainer<sup>1</sup>

Yorito Hattori<sup>1</sup>

Sung Ji Ahn<sup>1</sup>

Antoine Anfray<sup>1</sup>

Gang Wang<sup>1</sup>

Ken Uekawa<sup>1</sup>

James Seo<sup>1</sup>

Victoria Palfini<sup>1</sup>

Ismay Blanco<sup>1</sup>

Diana Acosta<sup>1,2</sup>

David Eliezer<sup>1,2</sup>

Ping Zhou<sup>1</sup>

Josef Anrather<sup>1</sup>

and

Costantino Iadecola<sup>1</sup>

<sup>1</sup>Feil Family Brain and Mind Research Institute, Weill Cornell Medicine, New York, NY USA;

<sup>2</sup>Department of Biochemistry, Weill Cornell Medicine, New York, NY USA

## Supplementary Table 1. Primary antibody list

### Primary antibodies for immunofluorescent staining

| Name        | Clone    | Host   | Antibody type | IgG subclasses        | Working dilution | Catalog number | Suppliers      |
|-------------|----------|--------|---------------|-----------------------|------------------|----------------|----------------|
| AQP4        | D1F8E    | Rabbit | Monoclonal    | IgG                   | 1:200            | 59678          | Cell Signaling |
| CD31        | MEC 13.4 | Rat    | Monoclonal    | IgG <sub>2a</sub> , k | 1:30             | 553371         | BD Biosciences |
| GFAP        | G-A-5    | Mouse  | Monoclonal    | IgG <sub>1</sub>      | 1:1000           | G3893          | Sigma          |
| Iba-1       | ---      | Rabbit | Policlonal    | ---                   | 1:500            | 019-19741      | Wako Chemical  |
| MBP         | 12       | Rat    | Monoclonal    | IgG <sub>2a</sub>     | 1:500            | MAB386         | EMD Millipore  |
| MAP2        | ---      | Rabbit | Policlonal    | ---                   | 1:500            | M3696          | Sigma          |
| NeuN        | EPR12763 | Rabbit | Monoclonal    | IgG                   | 1:100            | ab177487       | abcam          |
| Phospho-Tau | AT8      | Mouse  | Monoclonal    | IgG <sub>1</sub>      | 1:200            | MN1020         | ThermoFisher   |

### Primary antibodies for Western Blotting

| Name          | Clone  | Host   | Antibody type | IgG subclasses        | Working dilution | Catalog number | Suppliers          |
|---------------|--------|--------|---------------|-----------------------|------------------|----------------|--------------------|
| CamKII        | Cba-2  | Mouse  | Monoclonal    | IgG <sub>2a</sub> , k | 1:500            | 13-7300        | ThermoFisher       |
| GAPDH         | 6C5    | Mouse  | Monoclonal    | IgG <sub>1</sub>      | 1:500            | CB1001         | EMD Millipore      |
| GluN2B        | 13     | Mouse  | Monoclonal    | IgG <sub>2b</sub>     | 1:500            | 610416         | BD Biosciences     |
| MEK1/2        | ---    | Rabbit | Polyclonal    | ---                   | 1:1000           | 9122           | Cell Signalling    |
| nNOS          | ---    | Rabbit | Polyclonal    | ---                   | 1:2000           | BML-SA227      | Enzo Life Sciences |
| PSD95         | 16     | Mouse  | Monoclonal    | IgG <sub>1</sub>      | 1:250            | 610496         | BD Biosciences     |
| Phospho-Tau   | AT8    | Mouse  | Monoclonal    | IgG <sub>1</sub>      | 1:500            | MN1020         | ThermoFisher       |
| Phospho-Tau   | PHF-13 | Mouse  | Monoclonal    | IgG <sub>2b</sub>     | 1:1000           | 9632           | Cell Signalling    |
| Total Tau     | Tau46  | Mouse  | Monoclonal    | IgG <sub>1</sub>      | 1:1000           | 4019           | Cell Signalling    |
| Total Tau     | TAU-5  | Mouse  | Monoclonal    | IgG <sub>1</sub>      | 1:200            | AHB0042        | ThermoFisher       |
| Synaptophysin | D35E4  | Rabbit | Polyclonal    | IgG                   | 1:1000           | 5461S          | Cell Signalling    |

### Primary antibodies for immunoprecipitation

| Name            | Clone     | Host   | Antibody type | IgG subclasses    | Working dilution | Catalog number | Suppliers    |
|-----------------|-----------|--------|---------------|-------------------|------------------|----------------|--------------|
| nNOS            | PA3-032A  | Rabbit | Polyclonal    | IgG               | 4 µg             | PA3-032A       | ThermoFisher |
| PSD95           | 6G6-1C9   | Mouse  | Monoclonal    | IgG <sub>2a</sub> | 4 µg             | MA1-045        | ThermoFisher |
| Total Tau       | TAU-5     | Mouse  | Monoclonal    | IgG <sub>1</sub>  | 4 µg             | AHB0042        | ThermoFisher |
| Isotype control | RMG2a-62  | Rat    | Monoclonal    | IgG <sub>2a</sub> | 4 µg             | 407102         | BioLegend    |
| Isotype control | RMG1-1    | Rat    | Monoclonal    | IgG <sub>1</sub>  | 4 µg             | 406602         | BioLegend    |
| Isotype control | Poly29108 | Rabbit | Polyclonal    | IgG               | 4 µg             | 910801         | BioLegend    |

Supplementary Table 2. PCR primers used in the study

| Genes     | MGI symbol | Forward primers       | Reverse primers        |
|-----------|------------|-----------------------|------------------------|
| GluN1     | Grin1      | CTGCTCTCTGCAACCTGACTT | TGCCACTAGGGCAGTGAAG    |
| GluN2A    | Grin2a     | TAGACCTTAGCAGGCCCTCTC | GAGCTTTTGTTCCTCCAAGAGT |
| GluN2B    | Grin2b     | ACGGCAGCAAATCCTACTTCT | ACCACTGGCTTATTGGTGACA  |
| GluN2D    | Grin2d     | CTGGGGGACGATGAGATTGAG | AGCATGTAGAAGACACCTGCC  |
| Human tau | Mapt       | CCCAATCACTGCCTATACCC  | CCACGAGAATGCGAAGGA     |
| Mouse tau | Mapt       | AGCCCTAAGACTCCTCCA    | TGCTGTAGCCGCTTCGTTCT   |
