# Supplementary material for: Tau induces PSD95–neuronal NOS uncoupling and neurovascular dysfunction independent of neurodegeneration
Source: Springer Nature journal article supplement (doi:10.1038/s41593-020-0686-7), 2020-08-10

## Source Data 12

### **Tau induces PSD95-nNOS uncoupling and neurovascular dysfunction independent of neurodegeneration**

Laibaik Park<sup>1</sup>

Karin Hochrainer<sup>1</sup>

Yorito Hattori<sup>1</sup>

Sung Ji Ahn<sup>1</sup>

Antoine Anfray<sup>1</sup>

Gang Wang<sup>1</sup>

Ken Uekawa<sup>1</sup>

James Seo<sup>1</sup>

Victoria Palfini<sup>1</sup>

Ismay Blanco<sup>1</sup>

Diana Acosta<sup>1,2</sup>

David Eliezer<sup>1,2</sup>

Ping Zhou<sup>1</sup>

Josef Anrather<sup>1</sup>

and

Costantino Iadecola<sup>1</sup>

<sup>1</sup>Feil Family Brain and Mind Research Institute, Weill Cornell Medicine, New York, NY

USA; <sup>2</sup>Department of Biochemistry, Weill Cornell Medicine, New York, NY USA

Extended Date Fig. 10. NMDAR-related proteins in PS19 and rTg4510 mice, effects of WT tau on nNOS-PSD95 coupling.

Extended data Fig. 10A,B

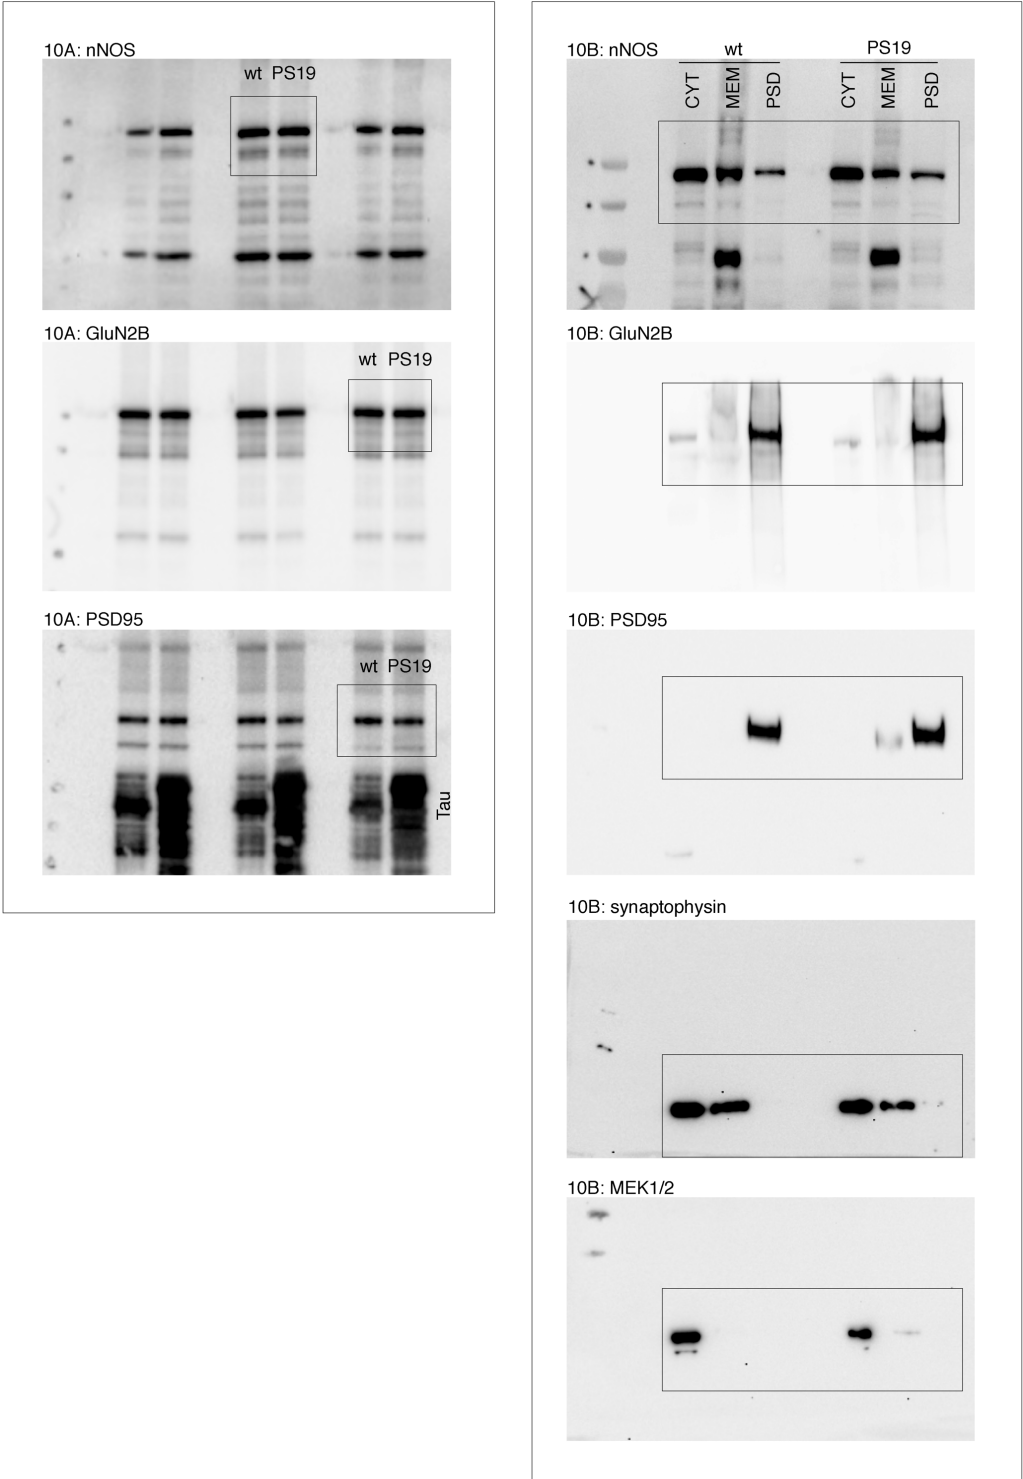

Extended data Fig. 10C,D

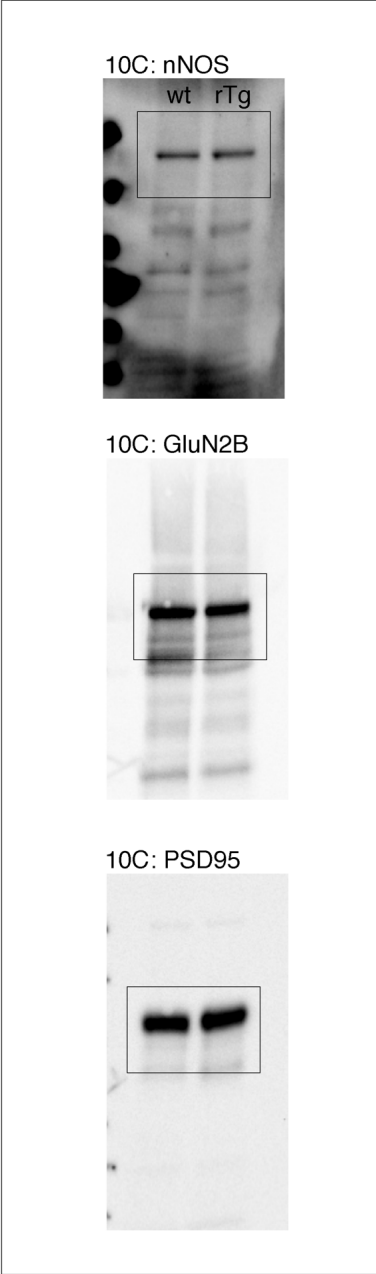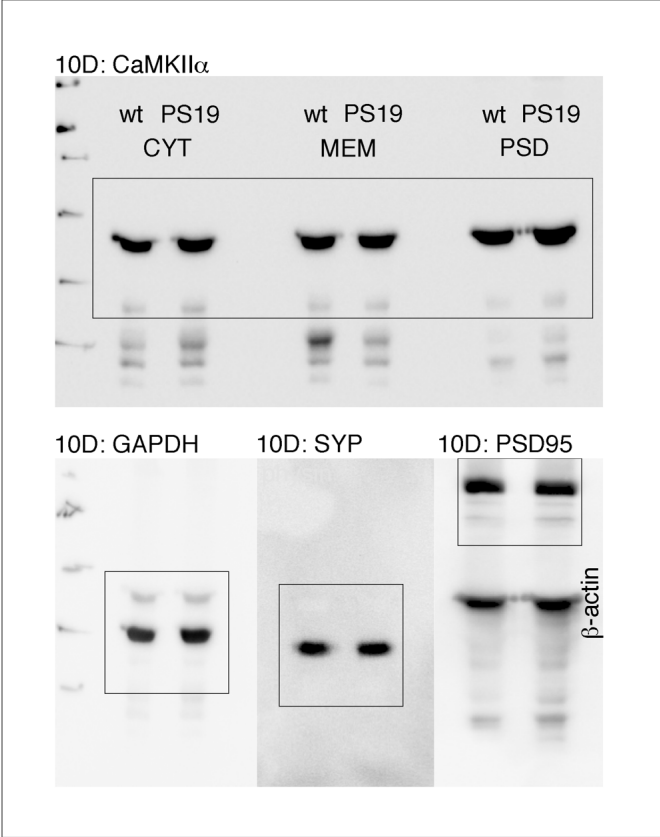

Extended data Fig. 10E-G

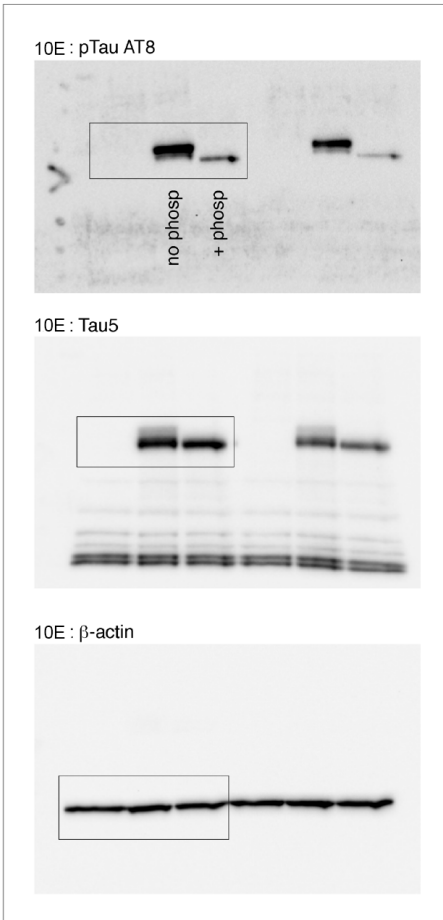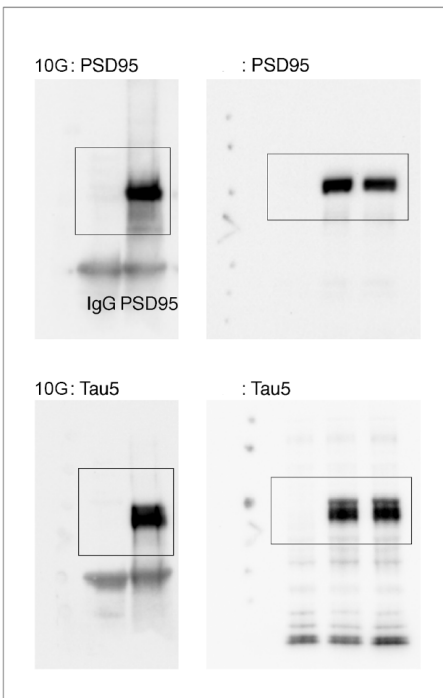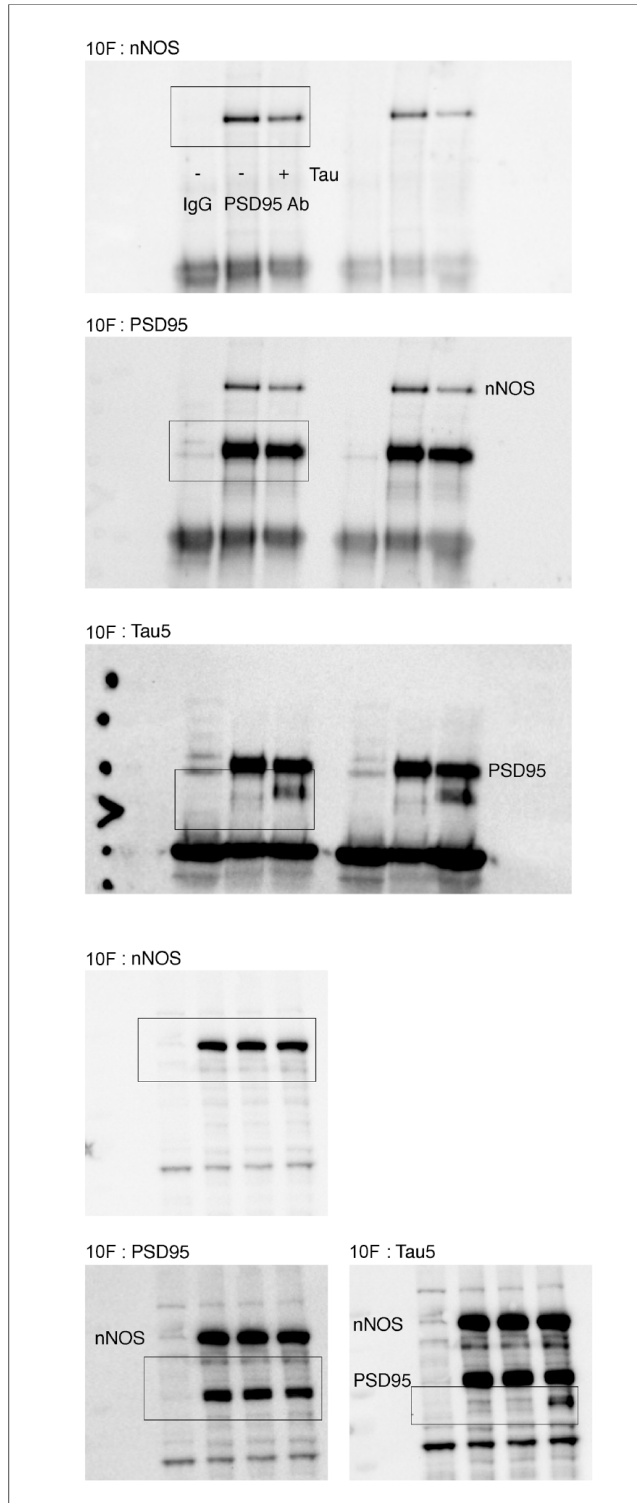

Supplement: 41593_2020_686_MOESM14_ESM.pdf [file 41593_2020_686_MOESM14_ESM.pdf]
